# Supplementary material for: A fluorescent N-doped carbon dot-hydrogel composite for concurrent selective detection and local hot spot promoted adsorption of uranium(vi)
Source: Royal Society of Chemistry journal article supplement (doi:10.1039/d3ew00527e), 2023-01-01
Supplement: d3ew00527e1.pdf [file d3ew00527e1.pdf]

## Supporting Information

### Fluorescent N doped carbon dots-hydrogel composite for concurrent selective detection and local hot spot promoted adsorption of uranium (VI)

Qun Wang <sup>a\*</sup>, Tao Han <sup>a</sup>, Caiqin Miao <sup>a</sup>, Wei Qin <sup>b</sup>, Xiaohong Wu <sup>a\*</sup>

<sup>a</sup> School of Chemistry and Chemical Engineering, and <sup>b</sup> School of Materials Science and Engineering, Harbin Institute of Technology, Harbin, 150001, China

#### Experimental Section:

- 1. Luminescent Sensing of U(VI):** Table S1 was listed to compare with the previous reported detection limitation [1-15].
- 2. Selection of the precursors of the NCDs:** Fluorescence CDs containing graphene core and organic shell have excellent water solubility and various groups on the surface which play a crucial role in donating the reactive sites for  $\text{UO}_2^{2+}$  ions. Literature using levofloxacin, a kind of fluorinated quinolone derivatives, as a precursor of synthetic carbon dots had been reported [16]. On the one hand, Levofloxacin has a similar structure compared to norfloxacin compound which has nitrogen heterocyclic structure and various phosphorescent characteristics. On the other hand, uranyl ion had assessment based on the fluorescence quenching of Norfoxacin [17]. Norfloxacin is one kind of polluted compound in water which is expected to removed or converted to environmental friendly CDs [18]. Therefore, we adopted norfloxacin with unique nitrogen heterocyclic structure as a precursor of synthetic NCDs for detection and adsorption of  $\text{UO}_2^{2+}$ .

**Table S1.** The detection limits comparison of the reported materials for  $\text{UO}_2^{2+}$ .

| Materials                               | Detection limit                             | Ref.      |
|-----------------------------------------|---------------------------------------------|-----------|
| CQDs                                    | 28 nM, 6.53 ppb                             | [1]       |
| HNU-50                                  | 12 nM, 2.77 ppb                             | [2]       |
| CMPAO                                   | 0.40 ppb                                    | [3]       |
| YTU-100                                 | 1.07 ppb                                    | [4]       |
| Tb-MOF/Tb-AG                            | 0.0012 ppb                                  | [5]       |
| CDs                                     | 4.7 ppb                                     | [6]       |
| FPD                                     | 2100 ppb                                    | [7]       |
| QDCOF                                   | 28.6 ppb                                    | [8]       |
| CDs                                     | 710 ppb                                     | [9]       |
| Titanium electrode                      | 24.5 ppb                                    | [10]      |
| Dual-color CDs                          | 1899 ppb                                    | [11]      |
| Tb-FAP/agar                             | 7.95 nM, 1.85 ppb                           | [12]      |
| COF                                     | 6.7 nM, 1.56 ppb                            | [13]      |
| small-molecule-based fluorescent probes | 10 nM–1 $\mu\text{M}$ ,<br>2.33 ppb–233 ppb | [14]      |
| TAPM-DHBD                               | 4.08 nM, 0.96 ppb                           | [15]      |
| NCDs-CMH                                | 8.4 nM, 1.94 ppb                            | This work |

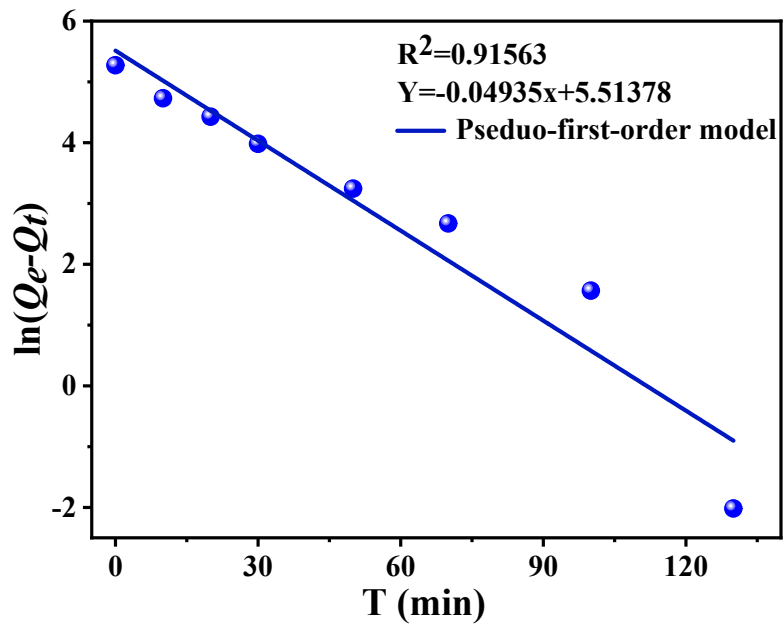

Fig.S1 the pseudo first order kinetic constant.  $q_e$ ,  $k_1$  can be calculated from the slope and intercept of the plot of  $\log (q_e - q_t)$  versus  $t$ .

Table.S2 The linear fitting results and kinetic parameters

| Parameter                  | Pseudo-first-order model   |         | Pseudo-second-order model              |         |
|----------------------------|----------------------------|---------|----------------------------------------|---------|
| $C_0$<br>$\text{mgL}^{-1}$ | $k_1$<br>$\text{min}^{-1}$ | $R^2$   | $k_2$<br>$\text{g}(\text{mgmin})^{-1}$ | $R^2$   |
| 100                        | -0.04935                   | 0.91563 | 0.00465                                | 0.99872 |

Table.S3 The estimated thermodynamic parameters are summarized.

| $T$ (K) | $K_d$ (mL/g)       | $\Delta H^\theta$ (kJ/mol) | $\Delta S^\theta$ (J/mol) | $\Delta G$ (kJ/mol) |
|---------|--------------------|----------------------------|---------------------------|---------------------|
| 295     | $1.90 \cdot 10^5$  |                            |                           | -25.68              |
| 315     | $1.939 \cdot 10^5$ | 28.35074                   | 183.15742                 | -29.34              |
| 335     | $1.974 \cdot 10^5$ |                            |                           | -33.01              |

Table.S4 The comparison of adsorption capacity with previously reported work.

| Absorption material              | $C_0$<br>(mg/L) | $Q_e$    | Ref.            |
|----------------------------------|-----------------|----------|-----------------|
| PAA/CS hydrogel                  | 500             | 290 mg/g | 19              |
| P(AAm/MA) hydrogels              | 1500            | 156 mg/g | 20              |
| Graphene (rGO) hydrogel          | 100             | 134 mg/g | 21              |
| Metal-phenolic network membranes | 238             | 140mg/L  | 22              |
| CS-Fe membranes                  | 30              | 170 mg/g | 23              |
| CMH-NCDs                         | 100             | 194 mg/g | <b>Our work</b> |

Reference:

- [1]Z. Zhang, D. Zhang, C. Shi, W. Liu, L.H. Chen, Y. Miao, D.W. Juan, J.L. Li, S. Wang, 3,4-Hydroxypyridinone-modified carbon quantum dot as a highly sensitive and selective fluorescent probe for the rapid detection of uranyl ions, *Environ. Sci. Nano*, 2019, 6, 1457-1465.
- [2]X.D. Qin, W. Yang, Y.H. Yang, D.X. Gu, D.Y. Guo, Q.H. Pan. A Zinc Metal-Organic Framework for Concurrent Adsorption and Detection of Uranium, *Inorg. Chem.* 2020, 59, 9857-9865.
- [3]M.Y. Xu, T. Wang, P. Gao, L. Zhao, L. Zhou, D.B. Hua. Highly fluorescent conjugated microporous polymers for concurrent adsorption and detection of uranium, *J. Mater. Chem. A*, 2019, 7, 11214-11222.
- [4]M. Lei, Y.Y. Jia, W. Zhang, J. Xie, Z.J. Xu, Y.L. Wang, W. Du, W. Liu. Ultrasensitive and Selective Detection of Uranium by a Luminescent Terbium-Organic Framework, *ACS Appl. Mater. Inter.*, 2021,13(43), 51086-51094.
- [5]A.Qi. Cui, X.Y. Wu, J.B. Ye, G. Song, D.Y. Chen, Jie. Xu, Y. Liu, J.P. Lai, H. Sun. “Two-in-one”dual-function luminescent MOF hydrogel for onsite ultra-sensitive detection and efficient enrichment of radioactive uranium in water, *J. Hazard. Mater.*, 2023, 448, 130864.
- [6] Q. Wang, H.Y. Zhang, D.M. Yu, W. Qin, X.H. Wu, Ultra-sensitive and stable N-doped carbon dots for selective detection of uranium through electron transfer induced  $UO_2^{2+}$ (V) sensing mechanism. *Carbon*, 2022, 198, 162-170.

- [7] Z. Wang, C. Xu, Y.X. Lu, G.Y. Wei, G. Ye, T.X. Sun, J. Chen, Microplasma electrochemistry controlled rapid preparation of fluorescent polydopamine nanoparticles and their application in uranium detection [J]. *Chem. Eng. J.* 2018, 344, 480-486.
- [8] M.C. Zhang, Y. Li, L.J. Ma, X.H. Guo, X.F. Li, K. Li, X.Y. Wang, C.Q. Xia, S.J. Li, Crystalline quantum dots of covalent organic frameworks for fast and sensitive detection of uranium, *Chem. Commun.*, 2020, 56, 880-883.
- [9] Z. Wang, Y.X. Lu, H. Yuan, Z.H. Ren, C. Xu, J. Chen, Microplasma-assisted rapid synthesis of luminescent nitrogen-doped carbon dots and their application in pH sensing and uranium detection, *Nanoscale*, 2015, 7, 20743-20748.
- [10] V. Urbanova, M. Pumera, Uranium detection by 3D-printed titanium structures: Towards decentralized nuclear forensic applications, *Appl. Mater Today.*, 2021, 21, 100881.
- [11] J.J. Qian, N.N. Cao, J. Zhang, J.J. Hou, Q. Chen, C. Zhang, Y.D. Sun, S.J. Liu, L.F. He, K. Zhang, H.B. Zhou, Field-portable ratiometric fluorescence imaging of dual-color label-free carbon dots for uranyl ions detection with cellphone-based optical platform, *Chin. Chem. Lett.*, 2020, 31, 2925-2928.
- [12] H.J. Liu, X.L. Wang, T. Abeywickrama, F. Jahanbazi, Z.F. Min, Z.R. Lee, J. Terry, Y. B. Mao, Biomimetically synthesized luminescent Tb<sup>3+</sup>-doped fluorapatite/agar nanocomposite for detecting UO<sub>2</sub><sup>2+</sup>, Cu<sup>2+</sup>, and Cr<sup>3+</sup> ions, *Environ. Sci. Nano.*, 2021, 8, 3711-3721.
- [13] W.R. Cui, C.R. Zhang, W. Jiang, F.F. Li, R.P. Liang, J.W. Liu, J.D. Qiu, Regenerable and stable sp<sup>2</sup> carbon-conjugated covalent organic frameworks for selective detection and extraction of uranium, *Nat. Commun.*, 2020, 11, 436(1-10).
- [14] Y.Y. Fang, W. Dehaen, Small-molecule-based fluorescent probes for f-block metal ions: a new frontier in chemosensors, *Coord. Chem. Rev.* 2021, 427, 213524.
- [15] W.R. Cui, Y.R. Chen, W. Xu, K. Liu, W.B. Qiu, Y. Li, J.D. Qiu. A three-dimensional luminescent covalent organic framework for rapid, selective, and reversible uranium detection and extraction. *Sep. Purif. Technol.* 2023, 306, 122726.
- [16] Tan J, Li Q, Meng S. Time-Dependent Phosphorescence Colors from Carbon Dots for Advanced Dynamic Information Encryption. *Adv. Mater.* 2021, 33, 2006781.
- [17] A. A. Elabd, O. A. Elhefnawy. Uranyl ion assessment based on the fluorescence quenching of Norfloxacin. *J. Radioanal. Nucl. Chem.* 2021, 329, 935-944.
- [18] P.C. Cai, J. Zhao, X.H. Zhang, T.Y., Zhang, G.M. Yin, S. Chen, C.L. Dong, Y. Huang, Y.Y. Sun, D.J. Y, B.S. Xing. Synergy between cobalt and nickel on NiCo<sub>2</sub>O<sub>4</sub> nanosheets promotes peroxydisulfate activation for efficient norfloxacin degradation. *Appl. Catal. B: Environ.* 2022, 306, 121091.
- [19] J.R. He, F.L. Sun, F.H. Han, J.J. Gu, M.R. Ou, W.K. Xu, X.P. Xu, Preparation of a novel

polyacrylic acid and chitosan interpenetrating network hydrogel for removal of U(vi) from aqueous solutions, *RSC Adv.*, 2018, **8**, 12684-12691.

- [20] P. Akkas, O. Guven, Enhancement of uranyl ion uptake by prestructuring of acrylamide–maleic acid hydrogels, *J. Appl. Polym. Sci.*, 2000, **78**, 284-289.
- [21] Y.R. He, S.C. Li, X.L. Li, Y. Yang, A.M. Tang, L. Du, Z.Y. Tan, D. Zhang, H.B. Chen, Graphene (rGO) hydrogel: A promising material for facile removal of uranium from aqueous solution, *Chem. Eng. J.*, 2018, **338**, 333-340.
- [22] W. Luo, G. Xiao, F. Tian, J.J. Richardson, Y.P. Wang, J.F. Zhou, J.L. Guo, X.P. Liao, B. Shi, Engineering robust metal-phenolic network membranes for uranium extraction from seawater, *Energy Environ. Sci.*, 2019, **12**, 607-614.
- [23] L.M. Zhou, H.B. Zou, Y. Wang, Z.R. Liu, Z.G. Le, G.L. Huang, T. Luo, A.A. Adesina, Immobilization of in situ generated Fe-0-nanoparticles in tripolyphosphate-crosslinking chitosan membranes for enhancing U(VI) adsorption, *J. Radioanal. Nucl. Chem.*, 2017, 311, 779-787.
